# Supplementary material for: Genome-scale DNA methylation maps of pluripotent and differentiated cells
Source: Springer Nature journal article supplement (doi:10.1038/nature07107), 2008-07-03
Supplement: 41586_2008_BFnature07107_MOESM261_ESM.pdf [file 41586_2008_BFnature07107_MOESM261_ESM.pdf]

**Supplementary Materials**  
**for**  
**Genome-scale DNA methylation maps of pluripotent and differentiated cells**

Alexander Meissner (1,2,3)\*, Tarjei S. Mikkelsen (2,4)\*, Hongcang Gu (2),  
Marius Wernig (1), Andrey Sivachenko (2), Xiaolan Zhang (2), Bradley E. Bernstein (2,5,6),  
Chad Nusbaum (2), David B. Jaffe (2), Andreas Gnirke (2), Rudolf Jaenisch (1,7) and Eric S.  
Lander (1,2,7,8)

- (1) Whitehead Institute for Biomedical Research, 9 Cambridge Center, Cambridge MA 02142
- (2) Broad Institute of MIT and Harvard, 7 Cambridge Center, Cambridge MA 02142
- (3) Department of Stem Cell and Regenerative Biology, Harvard University, Cambridge, MA 02138
- (4) Division of Health Sciences and Technology, Massachusetts Institute of Technology, Cambridge, MA 02139
- (5) Molecular Pathology Unit and Center for Cancer Research, MGH, Charlestown, Massachusetts 02129
- (6) Department of Pathology, Harvard Medical School, Boston, Massachusetts 02115
- (7) Department of Biology, Massachusetts Institute of Technology, Cambridge MA 02139
- (8) Department of Systems Biology, Harvard Medical School, Boston MA 02114

**Contents:**

Supplementary Tables S1-S7

Supplementary Figures S1-S9

All data analyzed in this study can be obtained from  
[http://www.broad.mit.edu/seq\\_platform/methylation/](http://www.broad.mit.edu/seq_platform/methylation/)

**Supplementary Table S1 – RRBS coverage as a function of size selection**

| RR digest: Mouse (mm8) |                 |           | Coverage                   |           | CpG islands |          | Enrichment <sup>b</sup> |     |                |
|------------------------|-----------------|-----------|----------------------------|-----------|-------------|----------|-------------------------|-----|----------------|
| Enzyme                 | Size range (bp) | Fragments | Sequence (Mb) <sup>a</sup> | CpGs      | All         | ≥10 CpGs | CpG islands             | TSS | Exons+ Introns |
| MspI                   | 40-120          | 186,429   | 13.4                       | 853,075   | 13,105      | 12,303   | 63.1                    | 7.8 | 1.4            |
| MspI                   | 100-220         | 185,349   | 13.3                       | 700,518   | 12,152      | 10,492   | 31.0                    | 5.1 | 1.3            |
| MspI                   | 220-400         | 144,683   | 10.4                       | 472,895   | 7,840       | 3,783    | 11.7                    | 3.6 | 1.4            |
| MspI                   | 40-220          | 333,104   | 24.0                       | 1,383,382 | 14,353      | 13,633   | 47.5                    | 6.5 | 1.3            |
| MspI                   | 40-400          | 476,883   | 34.3                       | 1,853,073 | 15,015      | 14,200   | 36.7                    | 5.6 | 1.3            |

The RRBS strategy can be applied to any mammalian genome. Due to the higher CpG and CpG island content of the human genome, the same size fractions will result in approximately twice as many fragments:

| RR digest: Human (hg18) |                 |           | Coverage                   |           | CpG islands |          | Enrichment <sup>b</sup> |     |                |
|-------------------------|-----------------|-----------|----------------------------|-----------|-------------|----------|-------------------------|-----|----------------|
| Enzyme                  | Size range (bp) | Fragments | Sequence (Mb) <sup>a</sup> | CpGs      | All         | ≥10 CpGs | CpG islands             | TSS | Exons+ Introns |
| MspI                    | 40-120          | 369,554   | 23.4                       | 1,808,076 | 22,434      | 21,069   | 41.7                    | 6.9 | 1.5            |
| MspI                    | 100-220         | 337,756   | 24.3                       | 1,463,283 | 21,064      | 18,206   | 19.2                    | 5.3 | 1.4            |
| MspI                    | 220-400         | 232,189   | 16.7                       | 843,688   | 14,415      | 7,542    | 8.6                     | 3.8 | 1.4            |
| MspI                    | 40-220          | 647,902   | 43.5                       | 2,985,666 | 24,633      | 23,303   | 30.0                    | 6.9 | 1.5            |
| MspI                    | 40-400          | 878,491   | 60.1                       | 3,823,195 | 25,783      | 24,336   | 24.1                    | 6.1 | 1.4            |

<sup>a</sup> Total unique and repetitive sequence covered, assuming 36 bp end reads

<sup>b</sup> Relative to complete genome sequence

**Supplementary Table S2 – RRBS libraries sequenced in this study**

| <b>RRBS Library source</b> | <b>Total reads<br/>(number of lanes<br/>of Illumina<br/>sequencing)</b> | <b>Aligned<br/>reads<sup>a</sup></b> | <b>Analyzed<br/>(high-<br/>quality)<br/>reads<sup>b</sup></b> | <b>Distinct<br/>CpGs</b> | <b>Median<br/>cov. (x)</b> | <b>Median<br/>CpG<br/>meth.<br/>level<br/>(%)</b> |
|----------------------------|-------------------------------------------------------------------------|--------------------------------------|---------------------------------------------------------------|--------------------------|----------------------------|---------------------------------------------------|
| Astrocytes (in vitro, P18) | 22,792,761 (7)                                                          | 9,304,473                            | 9,037,586                                                     | 951,422                  | 7                          | 70                                                |
| Astrocytes (primary, P11)  | 25,931,105 (4)                                                          | 10,080,532                           | 9,638,968                                                     | 928,227                  | 10                         | 42                                                |
| Astrocytes (primary, P2)   | 27,578,312 (4)                                                          | 10,452,548                           | 9,783,816                                                     | 919,407                  | 10                         | 25                                                |
| B cells                    | 15,742,954 (4)                                                          | 6,623,398                            | 6,416,120                                                     | 894,879                  | 7                          | 17                                                |
| Brain                      | 32,871,302 (4)                                                          | 12,007,722                           | 11,472,495                                                    | 906,010                  | 14                         | 10                                                |
| CD4+ T cells               | 17,425,940 (4)                                                          | 7,491,354                            | 7,312,532                                                     | 874,811                  | 9                          | 11                                                |
| CD8+ T cells               | 12,714,727 (3)                                                          | 5,673,776                            | 5,540,188                                                     | 821,388                  | 6                          | 10                                                |
| ES cells                   | 31,624,616 (10)                                                         | 13,620,414                           | 13,298,707                                                    | 950,671                  | 12                         | 14                                                |
| ES cells (Dnmt deficient)  | 23,899,182 (7)                                                          | 8,276,492                            | 8,062,719                                                     | 908,483                  | 8                          | 0                                                 |
| Liver                      | 20,644,156 (4)                                                          | 8,248,332                            | 7,983,808                                                     | 668,614                  | 8                          | 9                                                 |
| Lung                       | 17,469,597 (4)                                                          | 9,085,895                            | 9,017,768                                                     | 796,645                  | 6                          | 8                                                 |
| Embryonic fibroblasts      | 21,326,932 (7)                                                          | 9,507,186                            | 9,289,500                                                     | 903,921                  | 8                          | 23                                                |
| NPC (P18)                  | 20,086,908 (7)                                                          | 9,388,129                            | 9,118,163                                                     | 921,136                  | 9                          | 40                                                |
| NPC (P9)                   | 28,748,784 (4)                                                          | 11,496,175                           | 11,150,501                                                    | 912,408                  | 9                          | 55                                                |
| Sox1+                      | 31,030,042 (8)                                                          | 11,621,399                           | 11,314,731                                                    | 972,024                  | 11                         | 29                                                |
| Sox1+-derived NPCs         | 40,422,791 (6)                                                          | 13,291,166                           | 12,872,974                                                    | 996,991                  | 11                         | 35                                                |
| Spleen                     | 18,630,637 (4)                                                          | 9,985,486                            | 9,887,195                                                     | 799,684                  | 7                          | 8                                                 |
| Tail-tip fibroblasts       | 23,202,538 (7)                                                          | 10,765,328                           | 10,571,236                                                    | 948,249                  | 9                          | 11                                                |

<sup>a</sup> Number of total sequenced reads that could be aligned to the reduced representation reference sequence such that the second best alignment has at least  $\geq 2$  mismatches more than the best alignment. Reads may not align due to low quality, repetitive content or because they do not correspond to *in silico* predicted MspI fragments in the 40-220 bp size range. Alignment efficiency increased from ~30% (e.g ES cells) in early runs up to ~50-60% after instrument upgrades (i.e. Lung, Spleen). This is comparable to ChIP-Seq (see Table S3), indicating that bisulfite treatment does not result in a substantial loss of alignment efficiency. At present, 4 lanes of Illumina sequencing (2 per size fraction) are generally sufficient for complete coverage of a single RRBS library.

<sup>b</sup> Number of aligned reads that begin with a CG or TG dinucleotide and for which  $\sum_{q \in Q} 10^{q/10} > 1000$ , where Q denotes the read quality scores at each mismatched position.

**Supplementary Table S3 – ChIP-Seq libraries sequenced in this study**

| <b>ChIP-Seq Library source</b> | <b>Epitope</b> | <b>Total sequences (number of lanes of</b> | <b>Aligned reads <sup>a</sup></b> |
|--------------------------------|----------------|--------------------------------------------|-----------------------------------|
| ES cells                       | H3K4me2        | 22 million (3)                             | 4.1 million                       |
| ES cells                       | H3K4me1        | 14 million (2)                             | 6.0 million                       |
| Neural Progenitor Cells        | H3K4me2        | 27 million (4)                             | 9.4 million                       |
| Neural Progenitor Cells        | H3K4me1        | 23 million (4)                             | 6.7 million                       |
| Whole brain tissue             | H3K4me3        | 22 million (2)                             | 9.2 million                       |
| Whole brain tissue             | H3K4me2        | 27 million (2)                             | 9.9 million                       |
| Whole brain tissue             | H3K27me3       | 20 million (2)                             | 9.7 million                       |

<sup>a</sup> Number of total sequenced reads that could be aligned to the reference genome such that the second best alignment has at least  $\geq 2$  mismatches more than the best alignment, and the total number of mismatches is  $\leq 6$ . A significant portion of unaligned reads are due to low quality sequences generated by process artifacts, rather than repetitive sequences.

**Supplementary Table S4 – GO Categories enriched for HCPs with > 75% mean methylation in ES-derived astrocytes**

| <b>GO category</b> | <b>Description</b>                     | <b>p-value<sup>a</sup></b> | <b>Genes associated with methylated HCPs<sup>b</sup></b>                                                                                                          |
|--------------------|----------------------------------------|----------------------------|-------------------------------------------------------------------------------------------------------------------------------------------------------------------|
| GO:0007126         | Meiosis                                | 6.19E-05                   | Msh4,Sycp3,Sycp2,Spo11,Syce2,Sycp1,Dmc1                                                                                                                           |
| GO:0007155         | Cell adhesion                          | 0.000141                   | Dsc2,Cd97,Dsg2,Nlgn2,Cpxm2,Gp1bb,Lamc2,Scarf2,Pkp1,Pgm5,Ctgf,Col9a3,Parvb,Aebp1,Itga4,Col2a1,Cldn11                                                               |
| GO:0007165         | Signal transduction                    | 0.001517                   | Cd97,Gpr176,Cspg4,F2rl1,Lep,Gpr64,Ptger2,Plcd1,Sstr1,Oxtr,Tnfrsf25,Fgfr4,Galr2,Fgf20,Sstr4,Gpr83,Irak3,Fgf17,Prokr1,Prlhr,Stat5a,Htr1f,Gna14,Tacr3,Tnfrsf10b,Htr6 |
| GO:0007283         | Spermatogenesis                        | 0.002592                   | Taf71,Sycp3,Spag6,Dazl,Dmc1,D1Pas1,Msh4,Cldn11,Spag16                                                                                                             |
| GO:0009190         | Cyclic nucleotide biosynthetic process | 0.005906                   | Gucy2e,Npr1,Adcy7                                                                                                                                                 |
| GO:0006811         | Ion transport                          | 0.006922                   | Scnn1b,Grin2a,Clic6,Grik2,Atp2a3,Kcnj10,Slc34a2,Trpm6,Kcng1,Slc13a3,Kcna6,Bspry,Slc5a5,Plip,Kcnb1,Tmem37,Mcoln2                                                   |
| GO:0001541         | Ovarian follicle development           | 0.007887                   | Msh4,Dmc1,Spo11                                                                                                                                                   |
| GO:0006508         | Proteolysis                            | 0.008193                   | Mmp2,Ccdc79,Mmp23,A530088I07Rik,Agbl2,Mmp14,Casp8,Wdr31,Pgm5,Aebp1,Dhh,Adamts5,Npepl1                                                                             |
| GO:0007275         | Multicellular organismal development   | 0.00848                    | Taf71,Cspg4,Myod1,Dkk3,Nnat,Hoxd12,Sema4b,Nodal,Lect1,Pgf,Dazl,Dhh,Amn,Dll3,Tnfaip2,Ddx4,Slit1,Nsd1,Hhat,Cdx1,Nkx3.1,Otx2,Rax,Ebf2,Heyl,Efnb3,Scx,D1Pas1,Shroom3  |
| GO:0007218         | Neuropeptide signaling pathway         | 0.011283                   | Npb,Sstr1,Gal,Gpr64,Cd97                                                                                                                                          |
| GO:0001525         | Angiogenesis                           | 0.014419                   | Ctgf,Casp8,Tnfaip2,Pgf,Cspg4,Plcd1                                                                                                                                |
| GO:0007517         | Muscle development                     | 0.031826                   | Des,Ky,Myod1                                                                                                                                                      |
| GO:0016477         | Cell migration                         | 0.03212                    | Ctgf,Mmp14,Nodal,Itga4                                                                                                                                            |
| GO:0006836         | Neurotransmitter transport             | 0.03672                    | Slc18a2,Slc6a2,Slc6a11                                                                                                                                            |

<sup>a</sup> Nominal p-value of set enrichment based on Fisher's exact test (two-tailed)

<sup>b</sup> Based on GO annotations obtained from <http://geneontology.org>

**Supplementary Table S5 – GO Categories enriched for HCPs with > 50% mean methylation in ES-derived astrocytes**

| <b>GO category</b> | <b>Description</b>                   | <b>p-value<sup>a</sup></b> | <b>Genes associated with methylated HCPs<sup>b</sup></b>                                                                                                                                                                                                                                                                                                        |
|--------------------|--------------------------------------|----------------------------|-----------------------------------------------------------------------------------------------------------------------------------------------------------------------------------------------------------------------------------------------------------------------------------------------------------------------------------------------------------------|
| GO:0007165         | Signal transduction                  | 7.01E-06                   | Gpr37,Edaradd,Cd97,Grm8,Fgf15,Gpr176,Gpr101,Cspg4,F2r11,Wnt3,Lep,Gpr64,Edg3,Ptger2,Plcd1,Gpr12,Sstr1,Oxtr,Grb10,Tnfrsf25,Gm266,Ltb4r2,Fgfr4,Galr2,Drd5,Gpr156,Hif3a,Wnt10b,Fgf20,Fgf16,Sstr4,Gpr26,Gpr83,Pacsin1,Irak3,Htr2c,Adora2a,Pde8a,Fgf17,Gnas,Ntsr1,Prokr1,Prlhr,Stat5a,Htr1f,Gpr150,Gna14,Tacr3,Tnfrsf10b,Htr6,Wnt2                                    |
| GO:0007155         | Cell adhesion                        | 2.82E-05                   | Dsc2,Nlgn1,Cd97,Itgb4,Dsg2,Nlgn2,Cpxm2,Gp1bb,Lamc2,Pcdhac1,Scarf2,Sdk2,Pkp1,Pgm5,Ctgf,Col9a3,Parvb,Col18a1,Aebp1,Perp,Col12a1,8430419L09Rik,F11r,Emilin2,Thbs4,Itga4,Col2a1,Cldn11                                                                                                                                                                              |
| GO:0007275         | Multicellular organismal development | 2.82E-05                   | Ndrg2,Edaradd,Taf7l,Vamp5,Itgb4,Cspg4,Myod1,Lmx1b,Dkk3,Wnt3,Churc1,Nnat,Hoxd12,Bmp3,Sema4b,Snai1,Boll,Bmp8b,Nodal,Hic1,Hoxd9,Lect1,Pgf,Dazl,Dhh,Amn,Phox2a,Pitx2,T,Dll3,Gldn,Tnfaip2,Ddx4,Dlx4,Slit1,Wnt10b,Msx3,Nsd1,Mesp2,Htatip2,Hhat,Cdx1,Hoxd10,Hoxa11,4930506M07Rik,Nkx3.1,Otx2,Rax,Ebf2,Heyl,Sfrp2,Nkx1.2,Efnb3,Scx,Hoxd1,D1Pas1,Olig2,Nav1,Shroom3,Wnt2 |
| GO:0006817         | Phosphate transport                  | 6.48E-05                   | Scara3,Col2a1,Emid1,Col25a1,Col18a1,Col12a1,Slc34a2,Gldn,Emid2                                                                                                                                                                                                                                                                                                  |
| GO:0007126         | Meiosis                              | 0.00013                    | Msh4,Sycp3,Sycp2,Spo11,Syce2,Smc1b,Sycp1,Dmc1,Boll                                                                                                                                                                                                                                                                                                              |
| GO:0006811         | Ion transport                        | 0.00115                    | Scnn1b,Kcnf1,Grin2a,Clic6,Grik2,Atp2a3,P2rx5,Kcnj10,Slc34a2,Kcnk13,Trpm6,Kcng1,Kcnc4,Slc13a3,Slc39a8,Kcna6,Bspry,Slc5a5,Pkdrej,Pllp,P2rx2,Kcnb1,Kcnk4,Grin2c,Chrna3,Slc22a4,Grin3b,Gabrb1,Tmem37,Slc30a10,Mcoln2                                                                                                                                                |
| GO:0030199         | Collagen fibril organization         | 0.01084                    | Col2a1,Tnxb,Lox,Lmx1b                                                                                                                                                                                                                                                                                                                                           |
| GO:0001525         | Angiogenesis                         | 0.01566                    | Ctgf,Col18a1,Casp8,Tnfaip2,Sox18,Htatip2,Pgf,Cspg4,Plcd1                                                                                                                                                                                                                                                                                                        |
| GO:0051216         | Cartilage development                | 0.01936                    | Bmp3,Gnas,Bmp8b,Lect1                                                                                                                                                                                                                                                                                                                                           |
| GO:0007268         | Synaptic transmission                | 0.02197                    | Chrna3,Grin2a,P2rx2,Nrxn2,Grik2,Grm8                                                                                                                                                                                                                                                                                                                            |
| GO:0001501         | Skeletal development                 | 0.02207                    | Rai1,Dll3,Hoxd10,Gnas,Hoxa11,Hoxd12,Pthlh                                                                                                                                                                                                                                                                                                                       |

|            |                              |         |                                                                                                                           |
|------------|------------------------------|---------|---------------------------------------------------------------------------------------------------------------------------|
| GO:0006629 | Lipid metabolic process      | 0.02731 | Fads3,Srebf1,Pcsk9,Acot12,Mlst1,Slc27a3,Tnxb, Lep,Acot6,Slc27a2,Plcd1                                                     |
| GO:0006508 | Proteolysis                  | 0.02961 | Ctsf,Mmp2,Gpr26,Dnahc11,Ccdc79,Mmp23, A530088I07Rik,Agbl2,Mmp14,Casp8,Wdr31, Pgm5,Aebp1,Pcsk9,Dhh,St14,Adamts5,Ctsh,Npep1 |
| GO:0007283 | Spermatogenesis              | 0.04606 | Boll,Bmp8b,Taf71,Sycp3,Spag6,Dazl,Dmc1, D1Pas1,Msh4,Cldn11,Spag16                                                         |
| GO:0007517 | Muscle development           | 0.04622 | Des,Ky,Tagln2,Myod1                                                                                                       |
| GO:0001541 | Ovarian follicle development | 0.04828 | Msh4,Dmc1,Spo11                                                                                                           |

<sup>a</sup> Nominal p-value of set enrichment based on Fisher's exact test (two-tailed)

<sup>b</sup> Based on GO annotations obtained from <http://geneontology.org>

**Supplementary Table S6 – GO Categories depleted for HCPs with > 75% mean methylation in ES-derived astrocytes**

| <b>GO category</b> | <b>Description</b>              | <b>p-value<sup>a</sup></b> | <b>Genes associated with methylated HCPs<sup>b</sup></b> |
|--------------------|---------------------------------|----------------------------|----------------------------------------------------------|
| GO:0006512         | Ubiquitin cycle                 | 0.000243                   | Parc                                                     |
| GO:0015031         | Protein transport               | 0.001639                   | Lin7b,Rasef                                              |
| GO:0006412         | Translation                     | 0.010517                   | Eef1a2                                                   |
| GO:0006886         | Intracellular protein transport | 0.016169                   |                                                          |
| GO:0008380         | RNA splicing                    | 0.023412                   |                                                          |
| GO:0006397         | mRNA processing                 | 0.031508                   | Pap0lb                                                   |

<sup>a</sup> Nominal p-value of set enrichment based on Fisher's exact test (two-tailed)

<sup>b</sup> Based on GO annotations obtained from <http://geneontology.org>



**Supplementary Table S7 – GO Categories depleted for HCPs with > 50% mean methylation in ES-derived astrocytes**

| <b>GO category</b> | <b>Description</b>                            | <b>p-value<sup>a</sup></b> | <b>Genes associated with methylated HCPs<sup>b</sup></b> |
|--------------------|-----------------------------------------------|----------------------------|----------------------------------------------------------|
| GO:0006512         | ubiquitin cycle                               | 7.33E-08                   | Fbxo17,Parc                                              |
| GO:0015031         | protein transport                             | 9.07E-06                   | Rab3b,Pitpnm1,Lin7b,Sec31b,Rasef                         |
| GO:0006412         | translation                                   | 0.0001                     | Rps20,Eef1a2                                             |
| GO:0006397         | mRNA processing                               | 0.00014                    | Pap0lb                                                   |
| GO:0008380         | RNA splicing                                  | 0.00023                    |                                                          |
| GO:0006886         | intracellular protein transport               | 0.001                      | Rab3b                                                    |
| GO:0006281         | DNA repair                                    | 0.00444                    | Mpg                                                      |
| GO:0006974         | response to DNA damage stimulus               | 0.00448                    | Mpg                                                      |
| GO:0006457         | protein folding                               | 0.0091                     |                                                          |
| GO:0042254         | ribosome biogenesis and assembly              | 0.0141                     |                                                          |
| GO:0016568         | chromatin modification                        | 0.02006                    | Nsd1                                                     |
| GO:0051726         | regulation of cell cycle                      | 0.02915                    | Cdk11                                                    |
| GO:0006511         | ubiquitin-dependent protein catabolic process | 0.03008                    | Parc                                                     |
| GO:0051301         | cell division                                 | 0.03397                    | Sycp3,Sycp1,Syce2,Sycp2                                  |

<sup>a</sup> Nominal p-value of set enrichment based on Fisher's exact test (two-tailed)

<sup>b</sup> Based on GO annotations obtained from <http://geneontology.org>

# Supplementary Figure S1

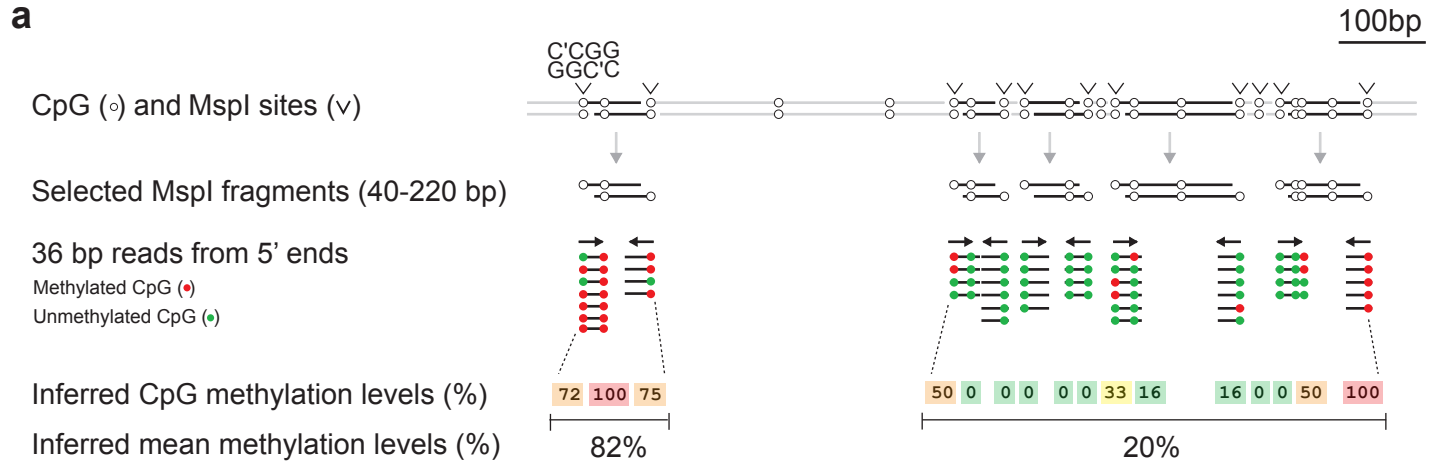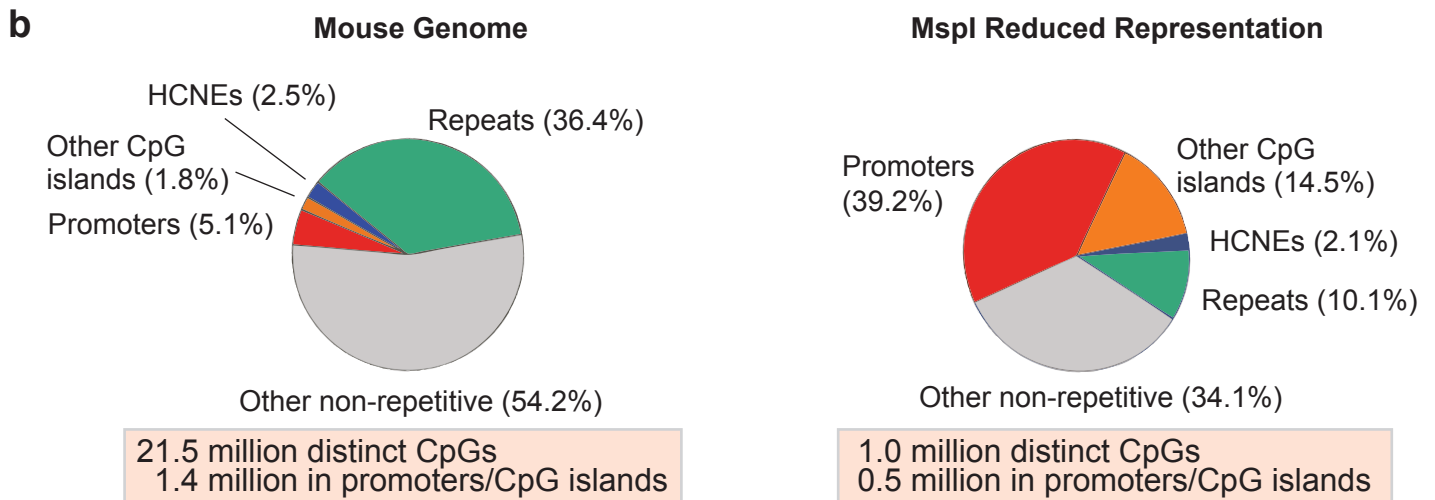

Reduced Representation Bisulfite Sequencing. **a**, Schematic overview of the RRBS approach. Genomic DNA is digested with methylation-insensitive MspI. Fragments between 40-220 bp are selected, treated with sodium bisulfite and 5' end-sequenced (see Supplementary Figure S2 for more details). CpGs are represented as open circles and MspI cut sites are indicated above (v). Filled circles represent either unmethylated (green) or methylated (red) CpGs at each sampled molecule. The methylation level of each CpG is inferred from the number of unconverted sites in reads overlapping that site. The inferred methylation level is shown below each CpG site. The color of the box ranges from green (<20% methylation) to red (>80% methylation). **b**, The MspI-based reduced representation fraction contains ~4.8% of all CpGs in the mouse genome, but is significantly enriched for HCPs and other CpG-rich sequence features.

## Supplementary Figure S2

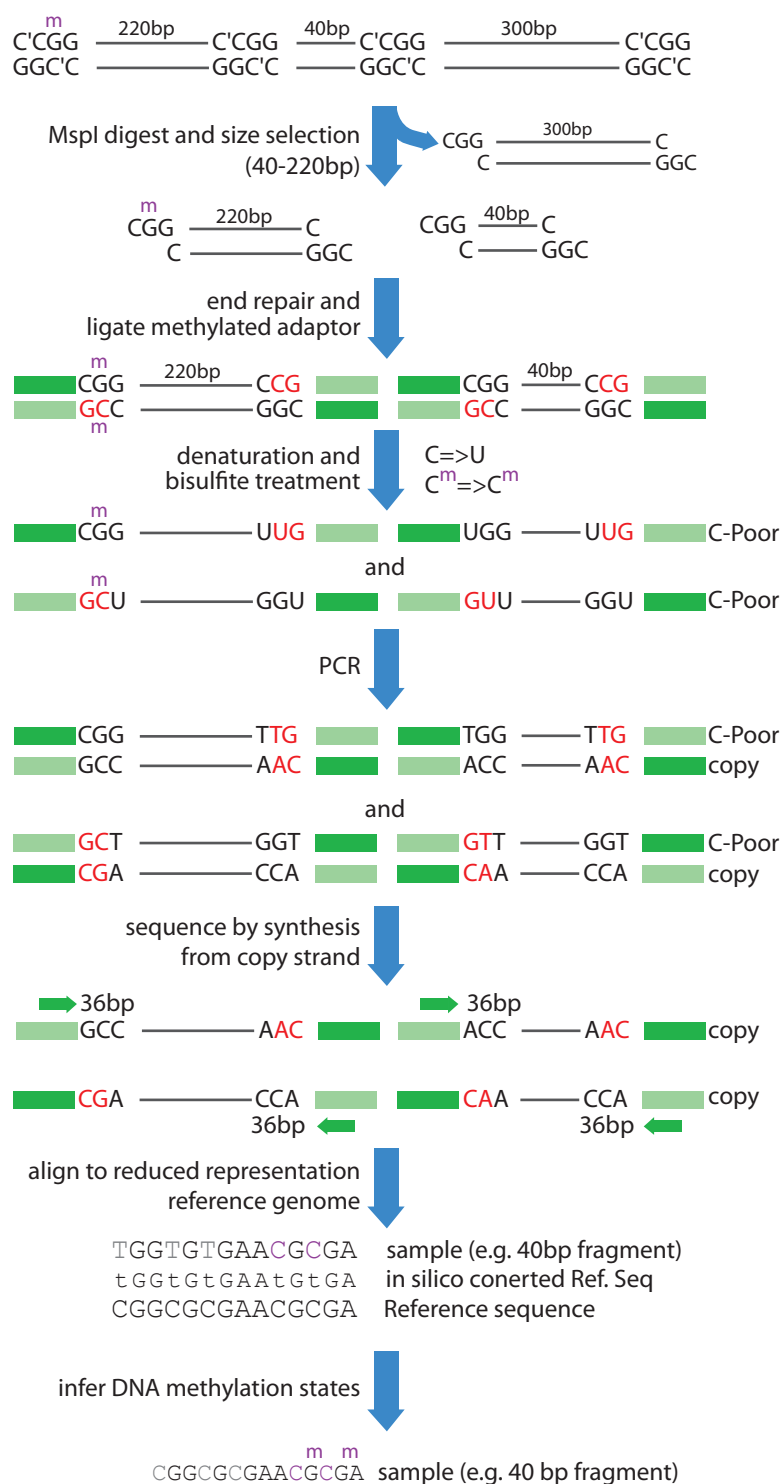

Overview of the RRBS process. Genomic DNA is digested with MspI, size selected, end-repaired and fitted with methylated Illumina/Solexa adapters prior to sodium bisulfite treatment and PCR enrichment. Sequenced reads are aligned to a reference genome digest to infer methylation levels.

## Supplementary Figure S3

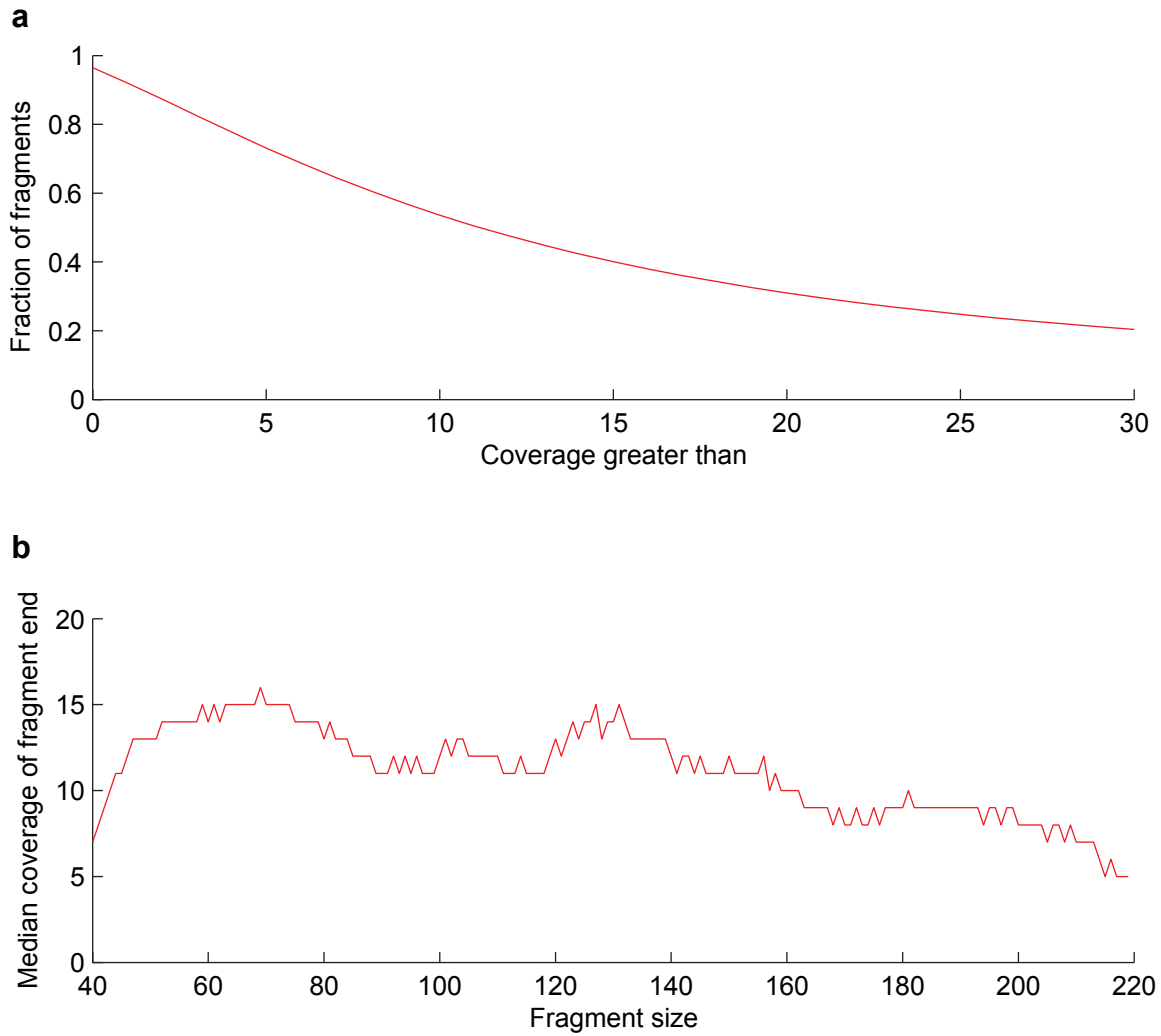

RRBS Library representation from ES cells. **a**, The majority (97%) of non-repetitive MspI fragment ends were observed at least once among 13 million aligned reads, and the median coverage was 12X. **b**, Median coverage was relatively similar for fragments of different lengths.

Supplementary Figure S4

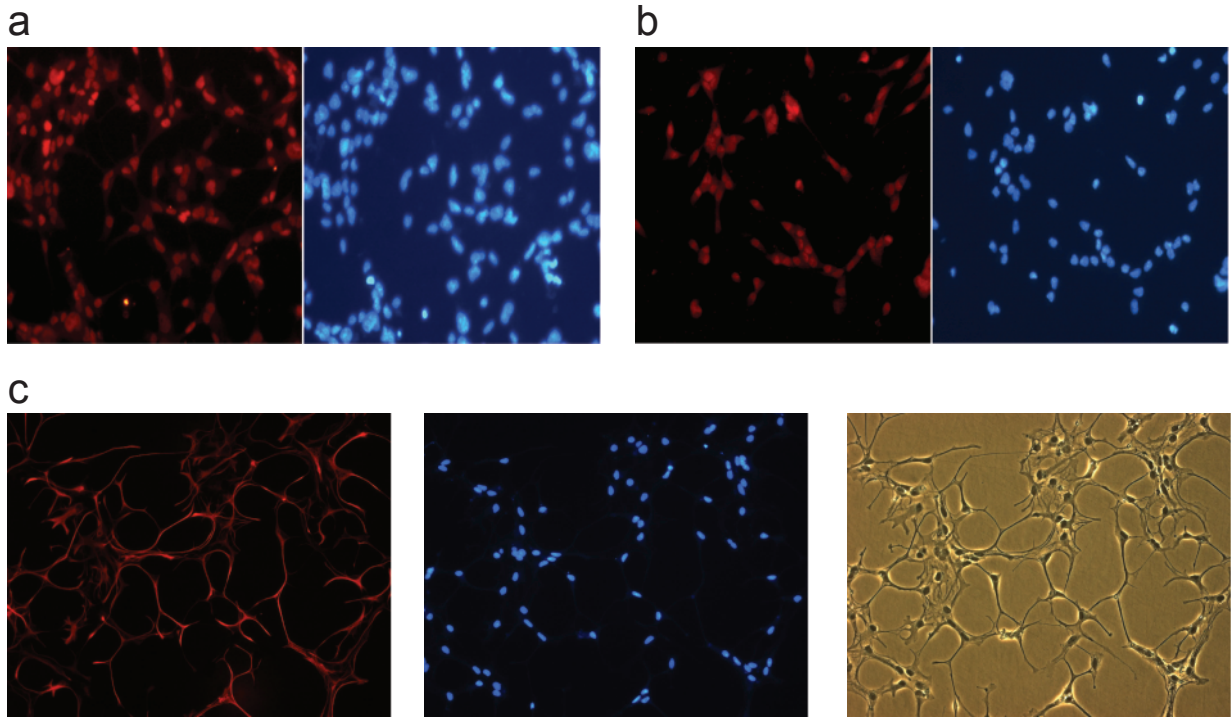

Immunohistochemistry of ES-derived neural progenitor cells (NPCs) and NPC-derived astrocytes. **a**, Sox2 (left) and DAPI (right) staining of NPCs. **b**, Brn2 (left) and DAPI (right) staining of NPCs. **c**, GFAP (left), DAPI (middle), brightfield (right) of astrocytes.

## Supplementary Figure S5

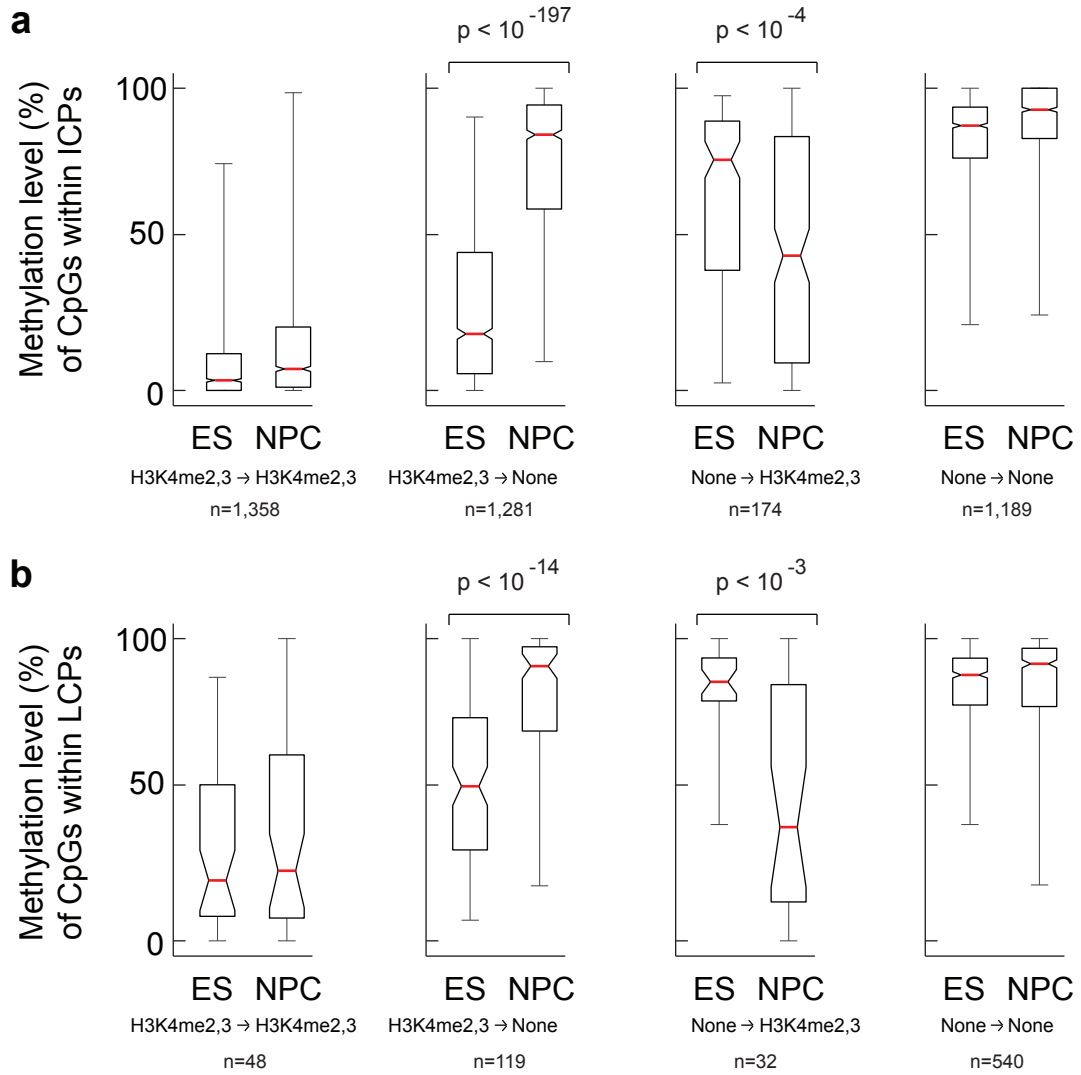

Distribution of CpG methylation levels for **(a)** intermediate CpG-density promoters (ICPs) and **(b)** low CpG-density promoters (LCPs), conditional on histone methylation states in ES cells and neural progenitor cells (NPCs). Changes in H3K4 methylation are significant correlated with inverse changes in DNA methylation levels (Mann-Whitney's U test).

## Supplementary Figure S6

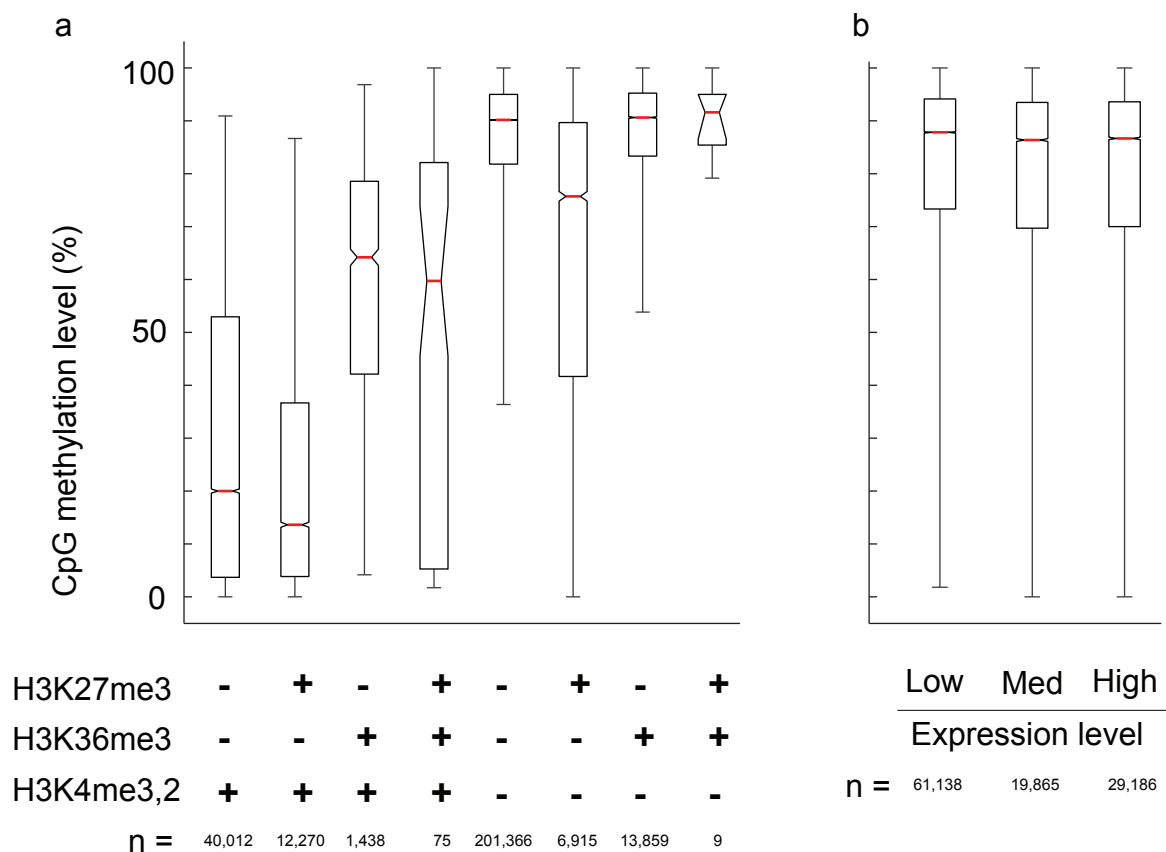

Correlations between histone methylation, expression levels and CpG methylation levels outside of annotated promoters and CpG islands in ES cells. **a**, H3K4me3 or H3K4me2 are correlated with low DNA methylation, whereas H3K36me3 and H3K27me3 alone is correlated with high DNA methylation levels. **b**, Distribution of methylation levels for CpGs overlapping known genes (excluding promoter regions), conditional on expression levels. Low = normalized absolute expression level < 50; Med  $\geq 50$  and < 200; High  $\geq 200$ .

## Supplementary Figure S7

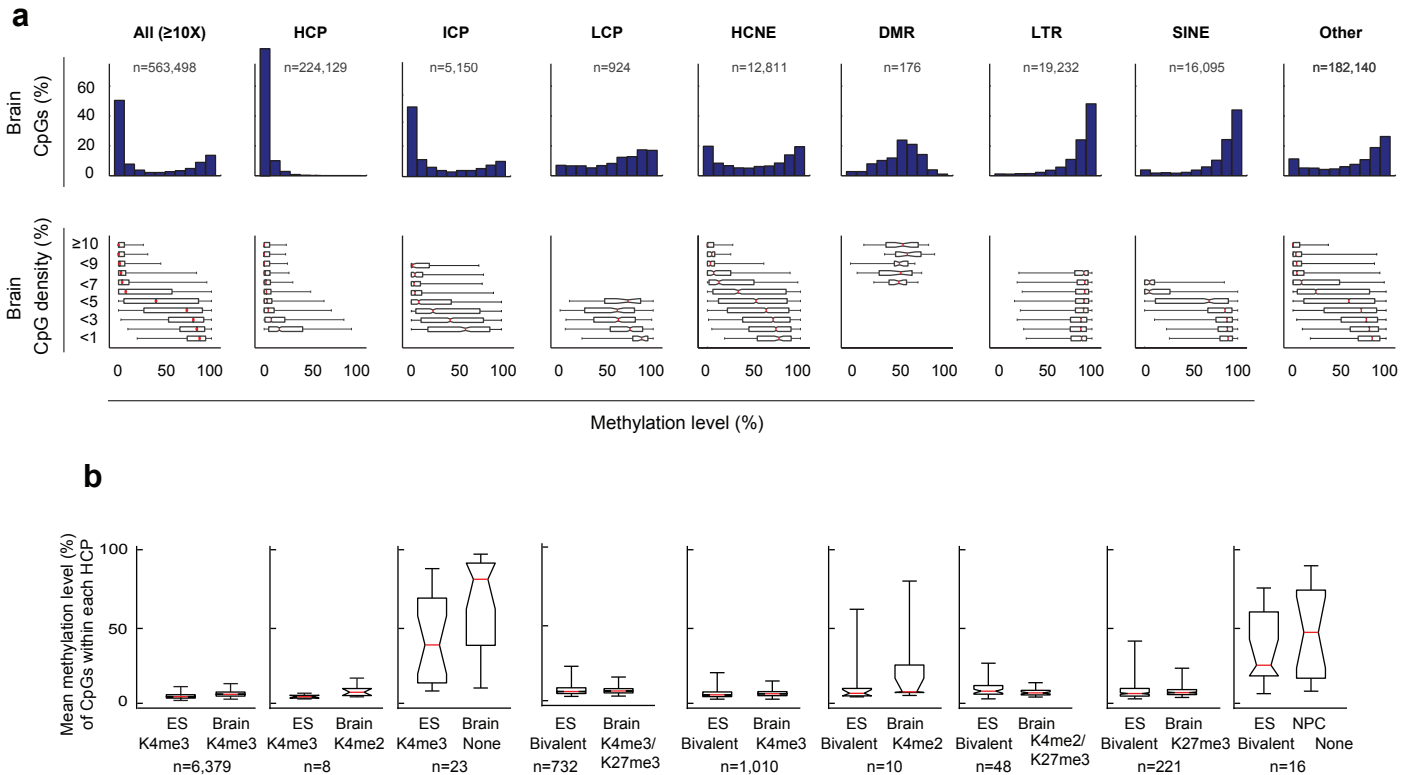

Distribution of CpG methylation levels inferred from a whole brain RRBS library. **a**, Distribution of inferred methylation levels for all CpGs with  $\geq 10X$  coverage in either ES cells or NPCs. The top histograms show and the distribution of methylation levels (%) across all CpGs, high CpG density promoters (HCP), intermediate CpG density promoters (ICP), low CpG density promoters (LCP), highly conserved non-coding elements (HCNE), differentially methylated regions (DMR), long terminal repeats (LTR), short interspersed elements (SINE) and other genomic features ( $n$  gives the number of CpGs in each category). The distribution of methylation levels is bimodal and correlated with CpG density and genomic features in a pattern similar to the observed in ES cells (see main text). **b**, The distribution of CpG and histone methylation states for HCPs in ES cells and whole brain. The vast majority of HCPs that are univalent (H3K4me3) in ES cells also show this state in the brain sample. The vast majority of HCPs that are bivalent in ES cells, retain at least one of these marks in the brain sample (enrichment of H3K4me3 and H3K27me3 may not represent bivalency due to heterogeneity). The absence of both H3K4me3 and H3K27me3 correlates with hypermethylation. The red lines denote medians, notches the standard errors, boxes the interquartile ranges, and whiskers the 2.5th and 97.5th percentiles.



## Supplementary Figure S8

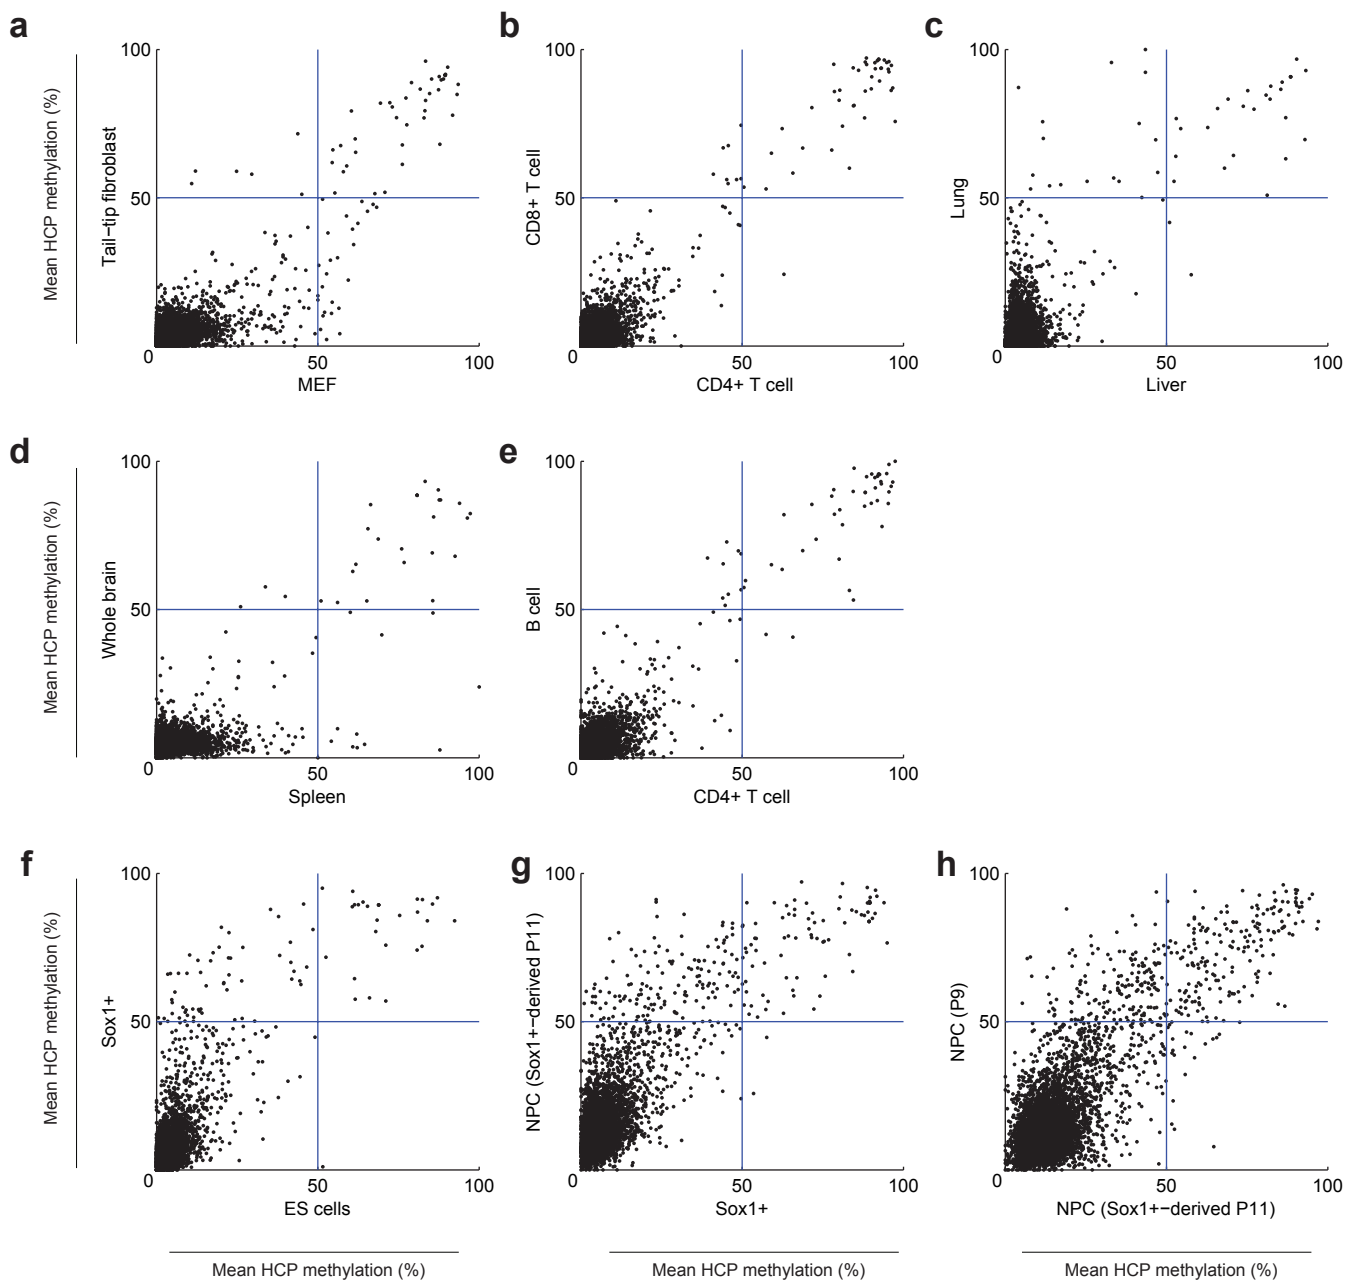

Inferred mean methylation levels (%) of autosomal HCPs compared across different primary and ES-derived cell populations. **a-e**, primary cell types contain only ~20-30 hypermethylated HCPs, largely associated with germline-specific genes. **f-h**, Progressive hypermethylation of HCPs during continued proliferation of Sox1+ progenitor cells. Sox1+ is the earliest known marker of neural progenitors and therefore allows isolation of a differentiated ES-derived population after minimal time in culture. There is initially little methylation in these cells, but after 11 passages in culture, many of the same HCPs that were methylated in the original NPC populations have also become methylated in Sox1+-derived NPCs.

Supplementary Figure S9

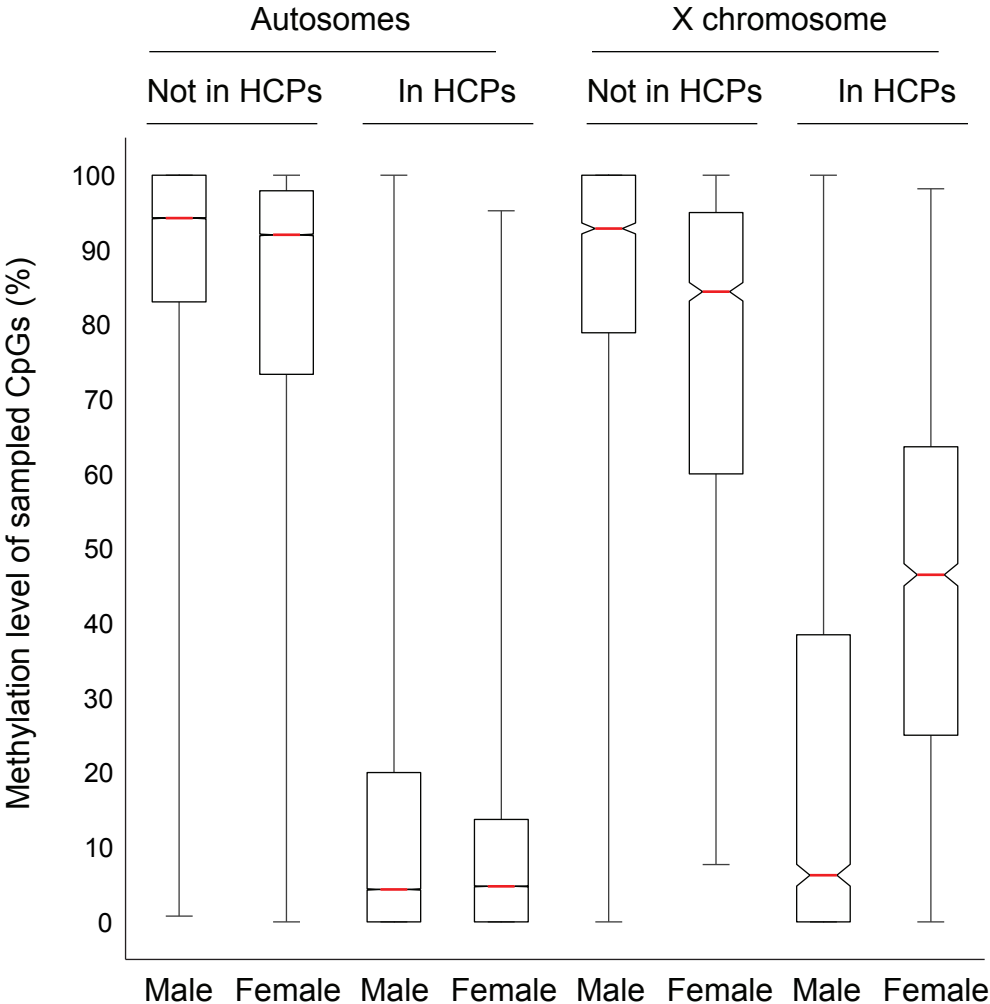

Comparison of methylation levels (%) for CpGs within and outside of HCPs in male and female cell populations (ES-derived and primary astrocytes, respectively). CpG islands show an average of ~50% methylation in the female population, consistent with hypermethylation of HCPs on the inactivated X-chromosome.
